# Supplementary material for: Use of Venetoclax in Patients with Relapsed or Refractory Acute Myeloid Leukemia: The PETHEMA Registry Experience
Source: MDPI journal article supplement (doi:10.3390/cancers14071734), 2022-03-29
Supplement: s1 [file s1]

**Table S1.** Coagulation, liver enzymes and renal function patients' characteristics prior to veneto-clax treatment.

| Variable                           | All patients |                 | Azacitidine + veneto-clax |                 | Decitabine + veneto-clax |                 | Low-dose cytarabine + venetoclax |                 |
|------------------------------------|--------------|-----------------|---------------------------|-----------------|--------------------------|-----------------|----------------------------------|-----------------|
|                                    | <i>n</i> (%) | Median (range)  | <i>n</i> (%)              | Median (range)  | <i>n</i> (%)             | Median (range)  | <i>n</i> (%)                     | Median (range)  |
| Total                              | 51(100)      |                 | 30(58.8)                  |                 | 15(29.4)                 |                 | 6 (11.8)                         |                 |
| Platelet count ( $\times 10^9/L$ ) | 48           | 26 (2–188)      | 29                        | 27 (4–179)      | 13                       | 26 (7–188)      | 6                                | 14.5 (2–43)     |
| Platelet $< 20 \times 10^9/L$      | 19(39.6)     |                 | 19(65.5)                  |                 | 8(61.5)                  |                 | 4(33.3)                          |                 |
| PT or APTT times                   | 37           |                 | 23                        |                 | 10                       |                 | 4                                |                 |
| Normal                             | 26 (70)      |                 | 17(73.9)                  |                 | 7 (70)                   |                 | 2 (50)                           |                 |
| Prolonged                          | 11 (30)      |                 | 6(26.1)                   |                 | 3 (30)                   |                 | 2 (50)                           |                 |
| Creatinine (mg/dL)                 | 49           | 0.82(0.34–1.70) | 30                        | 0.74(0.34–1.70) | 13                       | 0.91(0.53–1.40) | 6                                | 0.85(0.76–1.40) |
| Uric acid (mg/dL)                  | 46           | 4.0 (0.2–9.0)   | 27                        | 4.1 (1.3–9.0)   | 13                       | 4.0 (0.2–8.3)   | 6                                | 4.5 (2.8–6.9)   |
| Bilirubin (mg/dL)                  | 45           | 0.5 (0.1–1.7)   | 29                        | 0.5 (0.2–1.7)   | 10                       | 0.6 (0.1–0.9)   | 6                                | 0.6 (0.2–1.0)   |
| AST (U/L)                          | 51           | 20 (7–115)      | 30                        | 21 (7–86)       | 15                       | 15 (7–109)      | 6                                | 25 (14–115)     |
| ALT (U/L)                          | 51           | 21 (9–251)      | 30                        | 25 (9–86)       | 15                       | 16 (10–222)     | 6                                | 15 (9–102)      |
| ALP (U/L)                          | 51           | 65 (42–317)     | 30                        | 74 (55–258)     | 15                       | 43 (42–317)     | 6                                | 75 (62–157)     |
| LDH (U/L)                          | 51           | 210 (74–1029)   | 30                        | 205 (72–1029)   | 15                       | 207 (129–765)   | 6                                | 370 (169–765)   |
| Albumin (g/dL)                     | 36           | 3.4 (2.3–4.8)   | 21                        | 3.5 (2.3–4.8)   | 11                       | 3.2 (2.5–4.1)   | 4                                | 3.6 (3.0–4.1)   |

Abbreviations: ALP, Alkaline phosphatase; ALT, Alanine aminotransferase; AST, Aspartate aminotransferase; APTT, Activated partial thromboplastin time; LDH, Lactate dehydrogenase; PT, prothrombin time.

**Table S2.** Univariate analyses of factors influencing response to venetoclax in R/R-AML.

| Variable                              | CR/CRi       |          | ORR (CR/CRi + PR) |          |
|---------------------------------------|--------------|----------|-------------------|----------|
|                                       | <i>n</i> (%) | <i>p</i> | <i>n</i> (%)      | <i>p</i> |
| Total, <i>n</i> = 48                  | 6 (12.5)     | -        | 11 (22.9)         |          |
| Gender (male), <i>n</i> = 31          | 4 (12.9)     | 1.000    | 8 (25.8)          |          |
| Age                                   |              |          |                   |          |
| <65y, <i>n</i> = 17                   | 0 (0)        | 0.077    | 1 (5.9)           | 0.070    |
| ≥65y, <i>n</i> = 31                   | 6 (19.4)     |          | 10 (32.3)         |          |
| Secondary AML                         |              |          |                   |          |
| No, <i>n</i> = 28                     | 4 (14.3)     | 1.000    | 5 (17.9)          | 0.312    |
| Yes, <i>n</i> = 19                    | 2 (10.5)     |          | 6 (31.6)          |          |
| AML status                            |              |          |                   |          |
| Relapsed, <i>n</i> = 27               | 4 (14.8)     | 0.683    | 5 (18.5)          | 0.498    |
| Refractory, <i>n</i> = 21             | 2 (9.5)      |          | 6 (28.6)          |          |
| Refractory to any line prior VEN      |              |          |                   |          |
| No, <i>n</i> = 19                     | 4 (21.1)     | 0.197    | 4 (21.1)          | 1.000    |
| Yes, <i>n</i> = 29                    | 2 (6.9)      |          | 7 (24.1)          |          |
| Refractory to prior HMAs              |              |          |                   |          |
| No, <i>n</i> = 31                     | 4 (12.9)     | 1.000    | 7 (22.6)          | 1.000    |
| Yes, <i>n</i> = 17                    | 2 (11.8)     |          | 4 (23.5)          |          |
| ECOG performance status               |              |          |                   |          |
| 0, <i>n</i> = 8                       | 3 (37.5)     | 0.053    | 4 (50)            | 0.073    |
| ≥1, <i>n</i> = 39                     | 3 (7.7)      |          | 7 (17.9)          |          |
| WBC count (×10 <sup>9</sup> /L)       |              |          |                   |          |
| <10, <i>n</i> = 34                    | 4 (11.8)     | 1.000    | 7 (20.6)          | 0.687    |
| ≥10, <i>n</i> = 11                    | 1 (9.1)      |          | 3 (27.3)          |          |
| Platelet count (×10 <sup>9</sup> /L)  |              |          |                   |          |
| ≥20, <i>n</i> = 18                    | 1 (5.6)      | 0.634    | 4 (22.2)          | 1.000    |
| <20, <i>n</i> = 27                    | 4 (14.8)     |          | 6 (22.2)          |          |
| Bone marrow blast count, %            |              |          |                   |          |
| <50, <i>n</i> = 27                    | 4 (14.8)     | 0.645    | 6 (22.2)          | 1.000    |
| ≥50, <i>n</i> = 14                    | 1 (7.1)      |          | 3 (21.4)          |          |
| Myelodysplasia related changes AML    |              |          |                   |          |
| No, <i>n</i> = 15                     | 3 (20)       | 0.360    | 4 (26.7)          | 0.720    |
| Yes, <i>n</i> = 33                    | 3 (9.1)      |          | 7 (21.2)          |          |
| Cytogenetics                          |              |          |                   |          |
| Favorable/Intermediate, <i>n</i> = 22 | 4 (18.2)     | 0.665    | 8 (36.4)          | 0.116    |
| Adverse, <i>n</i> = 20                | 2 (10)       |          | 3 (15)            |          |
| MRC risk stratification               |              |          |                   |          |
| Favorable/Intermediate, <i>n</i> = 19 | 4 (21.1)     | 0.398    | 6 (31.6)          | 0.473    |
| Adverse, <i>n</i> = 21                | 2 (9.5)      |          | 4 (19)            |          |
| ELN 2017 risk stratification          |              |          |                   |          |
| Favorable/Intermediate, <i>n</i> = 5  | 1 (20)       | 0.561    | 1 (20)            | 1.000    |
| Adverse, <i>n</i> = 30                | 4 (13.3)     |          | 7 (23.3)          |          |
| Somatic mutations                     |              |          |                   |          |
| NPM1 negative, <i>n</i> = 33          | 3 (9.1)      | 0.036    | 6 (18.3)          | 0.123    |
| NPM1 positive, <i>n</i> = 6           | 3 (50)       |          | 3 (50)            |          |
| FLT3-ITD negative, <i>n</i> = 35      | 5 (14.3)     | 0.502    | 7 (20)            | 0.223    |
| FLT3-ITD positive, <i>n</i> = 4       | 1 (25)       |          | 2 (50)            |          |
| CEBPA negative, <i>n</i> = 20         | 1 (5)        | 0.034    | 1 (5)             | 0.002    |

|                            |          |       |          |       |
|----------------------------|----------|-------|----------|-------|
| CEBPA monoallelic, $n = 3$ | 2 (66.7) |       | 3 (100)  |       |
| P53 unmutated, $n = 20$    | 3 (15)   | 0.606 | 6 (30)   | 1.000 |
| P53 mutated, $n = 8$       | 2 (25)   |       | 2 (25)   |       |
| IDH1/2 negative, $n = 19$  | 2 (10.5) | 0.287 | 5 (19)   | 1.000 |
| IDH1/2 positive, $n = 7$   | 2 (28.6) |       | 2 (28.6) |       |
| RUNX1 negative, $n = 20$   | 4 (20)   | 0.542 | 6 (30)   | 1.000 |
| RUNX1 positive, $n = 6$    | 0 (0)    |       | 1 (16.7) |       |
| ASXL1 negative, $n = 21$   | 3 (14.3) | 1.000 | 5 (23.8) | 0.588 |
| ASXL1 positive, $n = 5$    | 1 (20)   |       | 2 (40)   |       |
| Prior treatment with HMAs  |          |       |          |       |
| No, $n = 23$               | 4 (17.4) | 0.407 | 7 (30.4) | 0.311 |
| Yes, $n = 25$              | 2 (8.0)  |       | 4 (16.0) |       |
| Prior HSCT                 |          |       |          |       |
| No, 35                     | 4 (11.4) | 0.637 | 9 (25.7) | 0.703 |
| Yes, 12                    | 2 (16.7) |       | 2 (16.7) |       |

Abbreviations: AML, Acute myeloid leukemia; CR, Complete remission; CRi, CR with incomplete blood count recovery; ELN, European LeukemiaNet; ECOG, Eastern Cooperative Oncology Group scale; FLT3-ITD, fms related receptor tyrosine kinase 3 internal tandem duplications; HMAs, Hypomethylating agents; HSCT, hematopoietic stem cell transplant; MRC, Medical Research Council; NMP1, nucleophosmin 1; PR, Partial response; R/R-AML, relapsed/refractory acute myeloid leukemia; WBC, White blood cell.

**Table S3.** Factors influencing survival in R/R-AML patients treated with venetoclax.

| Variable                              | Median (days) | <i>p</i> -Univariate |
|---------------------------------------|---------------|----------------------|
| Total, <i>n</i> = 51                  | 104           |                      |
| Gender                                |               |                      |
| Male, <i>n</i> = 33                   | 78            | 0.217                |
| Female, <i>n</i> = 18                 | 131           |                      |
| Age                                   |               |                      |
| <65y, <i>n</i> = 17                   | 34            | 0.919                |
| ≥65y, <i>n</i> = 34                   | 34            |                      |
| Secondary AML                         |               |                      |
| No, <i>n</i> = 30                     | 104           | 0.522                |
| Yes, <i>n</i> = 20                    | 104           |                      |
| AML status                            |               |                      |
| Relapsed, <i>n</i> = 29               | 78            | 0.262                |
| Refractory, <i>n</i> = 22             | 131           |                      |
| Refractory to any line prior VEN      |               |                      |
| No, <i>n</i> = 21                     | 99            | 0.825                |
| Yes, <i>n</i> = 30                    | 128           |                      |
| Refractory to prior HMAs              |               |                      |
| No, <i>n</i> = 34                     | 104           | 0.976                |
| Yes, <i>n</i> = 17                    | 120           |                      |
| ECOG performance status               |               |                      |
| 0, <i>n</i> = 10                      | NR            | 0.001                |
| ≥1, <i>n</i> = 40                     | 75            |                      |
| WBC count (×10 <sup>9</sup> /L)       |               |                      |
| <10, <i>n</i> = 36                    | 120           | 0.266                |
| ≥10, <i>n</i> = 12                    | 69            |                      |
| Platelet count (×10 <sup>9</sup> /L)  |               |                      |
| ≥20, <i>n</i> = 19                    | 78            | 0.576                |
| <20, <i>n</i> = 29                    | 120           |                      |
| Bone marrow blast count, %            |               |                      |
| <50, <i>n</i> = 28                    | 104           | 0.261                |
| ≥50, <i>n</i> = 16                    | 78            |                      |
| Myelodysplasia related changes AML    |               |                      |
| No, <i>n</i> = 17                     | 99            | 0.797                |
| Yes, <i>n</i> = 34                    | 104           |                      |
| Cytogenetics                          |               |                      |
| Favorable/Intermediate, <i>n</i> = 24 | 99            | 0.616                |
| Adverse, <i>n</i> = 20                | 104           |                      |
| MRC risk stratification               |               |                      |
| Favorable/Intermediate, <i>n</i> = 20 | 78            | 0.517                |
| Adverse, <i>n</i> = 22                | 104           |                      |
| ELN 2017 risk stratification          |               |                      |
| Favorable/Intermediate, <i>n</i> = 5  | 43            | 0.458                |
| Adverse, <i>n</i> = 31                | 104           |                      |
| Somatic mutations                     |               |                      |
| NPM1 negative, <i>n</i> = 35          | 104           | 0.729                |
| NPM1 positive, <i>n</i> = 6           | 99            |                      |
| FLT3-ITD negative, <i>n</i> = 36      | 99            | 0.083                |
| FLT3-ITD positive, <i>n</i> = 5       | NR            |                      |

|                                |     |       |
|--------------------------------|-----|-------|
| CEBPA negative, <i>n</i> = 22  | 69  | 0.148 |
| CEBPA monoalelic, <i>n</i> = 3 | 131 |       |
| P53 unmutated, <i>n</i> = 21   | 99  | 0.992 |
| P53 mutated, <i>n</i> = 8      | 104 |       |
| IDH1/2 negative, <i>n</i> = 19 | 99  | 0.552 |
| IDH1/2 positive, <i>n</i> = 8  | NR  |       |
| RUNX1 negative, <i>n</i> = 21  | 104 | 0.408 |
| RUNX1 positive, <i>n</i> = 6   | 66  |       |
| ASXL1 negative, <i>n</i> = 21  | 99  | 0.674 |
| ASXL1 positive, <i>n</i> = 5   | NR  |       |
| Prior treatment with HMAs      |     |       |
| No, <i>n</i> = 25              | 128 | 0.489 |
| Yes, <i>n</i> = 26             | 78  |       |
| Prior HSCT                     |     |       |
| No, 38                         | 99  | 0.510 |
| Yes, 12                        | 128 |       |
| Venetoclax combination         |     |       |
| Azacitidine, <i>n</i> = 30     | 120 | 0.875 |
| Decitabine, <i>n</i> = 15      | 104 |       |
| LDAC, <i>n</i> = 6             | 69  |       |
| Response to venetoclax         |     |       |
| CR/CRi, <i>n</i> = 6           | 215 | 0.008 |
| PR, <i>n</i> = 5               | 144 |       |
| < PR, <i>n</i> = 37            | 69  |       |
| ORR (CR + CRi + PR)            |     |       |
| No, 37                         | 69  | 0.004 |
| Yes, 11                        | 215 |       |

Abbreviations: AML, Acute myeloid leukemia; CR, Complete remission; CRi, CR with incomplete blood count recovery; ELN, European LeukemiaNet; ECOG, Eastern Cooperative Oncology Group scale; FLT3-ITD, fms related receptor tyrosine kinase 3 internal tandem duplications; HMAs, Hypomethylating agents; HSCT, hematopoietic stem cell transplant; LDAC, Low-dose cytarabine; MRC, Medical Research Council; NMP1, nucleophosmin 1; ORR, Overall response rate; PR, Partial response; R/R-AML, relapsed/refractory acute myeloid leukemia; WBC, White blood cell.
